# Supplementary material for: Alpha/beta power decreases track the fidelity of stimulus-specific information
Source: eLife journal article supplement (doi:10.7554/elife.49562), 2019-11-29
Supplement: supp [file elife-49562-supp-v1.zip]

Archive with 11 entries (11 files):
- elife_poa_e49562_Figure_2_figure_supplement_1.jpg
- elife_poa_e49562_Figure_3_figure_supplement_1.jpg
- elife_poa_e49562_Transparent_Reporting_File.pdf
- elife_poa_e49562_Figure_4_figure_supplement_4.jpg
- elife_poa_e49562_Supplementary_file_1.docx
- elife_poa_e49562_Figure_2_figure_supplement_2.jpg
- elife_poa_e49562_Figure_4_figure_supplement_6.jpg
- elife_poa_e49562_Figure_4_figure_supplement_2.jpg
- elife_poa_e49562_Figure_4_figure_supplement_3.jpg
- elife_poa_e49562_Figure_4_figure_supplement_1.jpg
- elife_poa_e49562_Figure_4_figure_supplement_5.jpg
