# Supplementary figures and images for: Alpha/beta power decreases track the fidelity of stimulus-specific information
Source: eLife journal article supplement (doi:10.7554/elife.49562), 2019-11-29

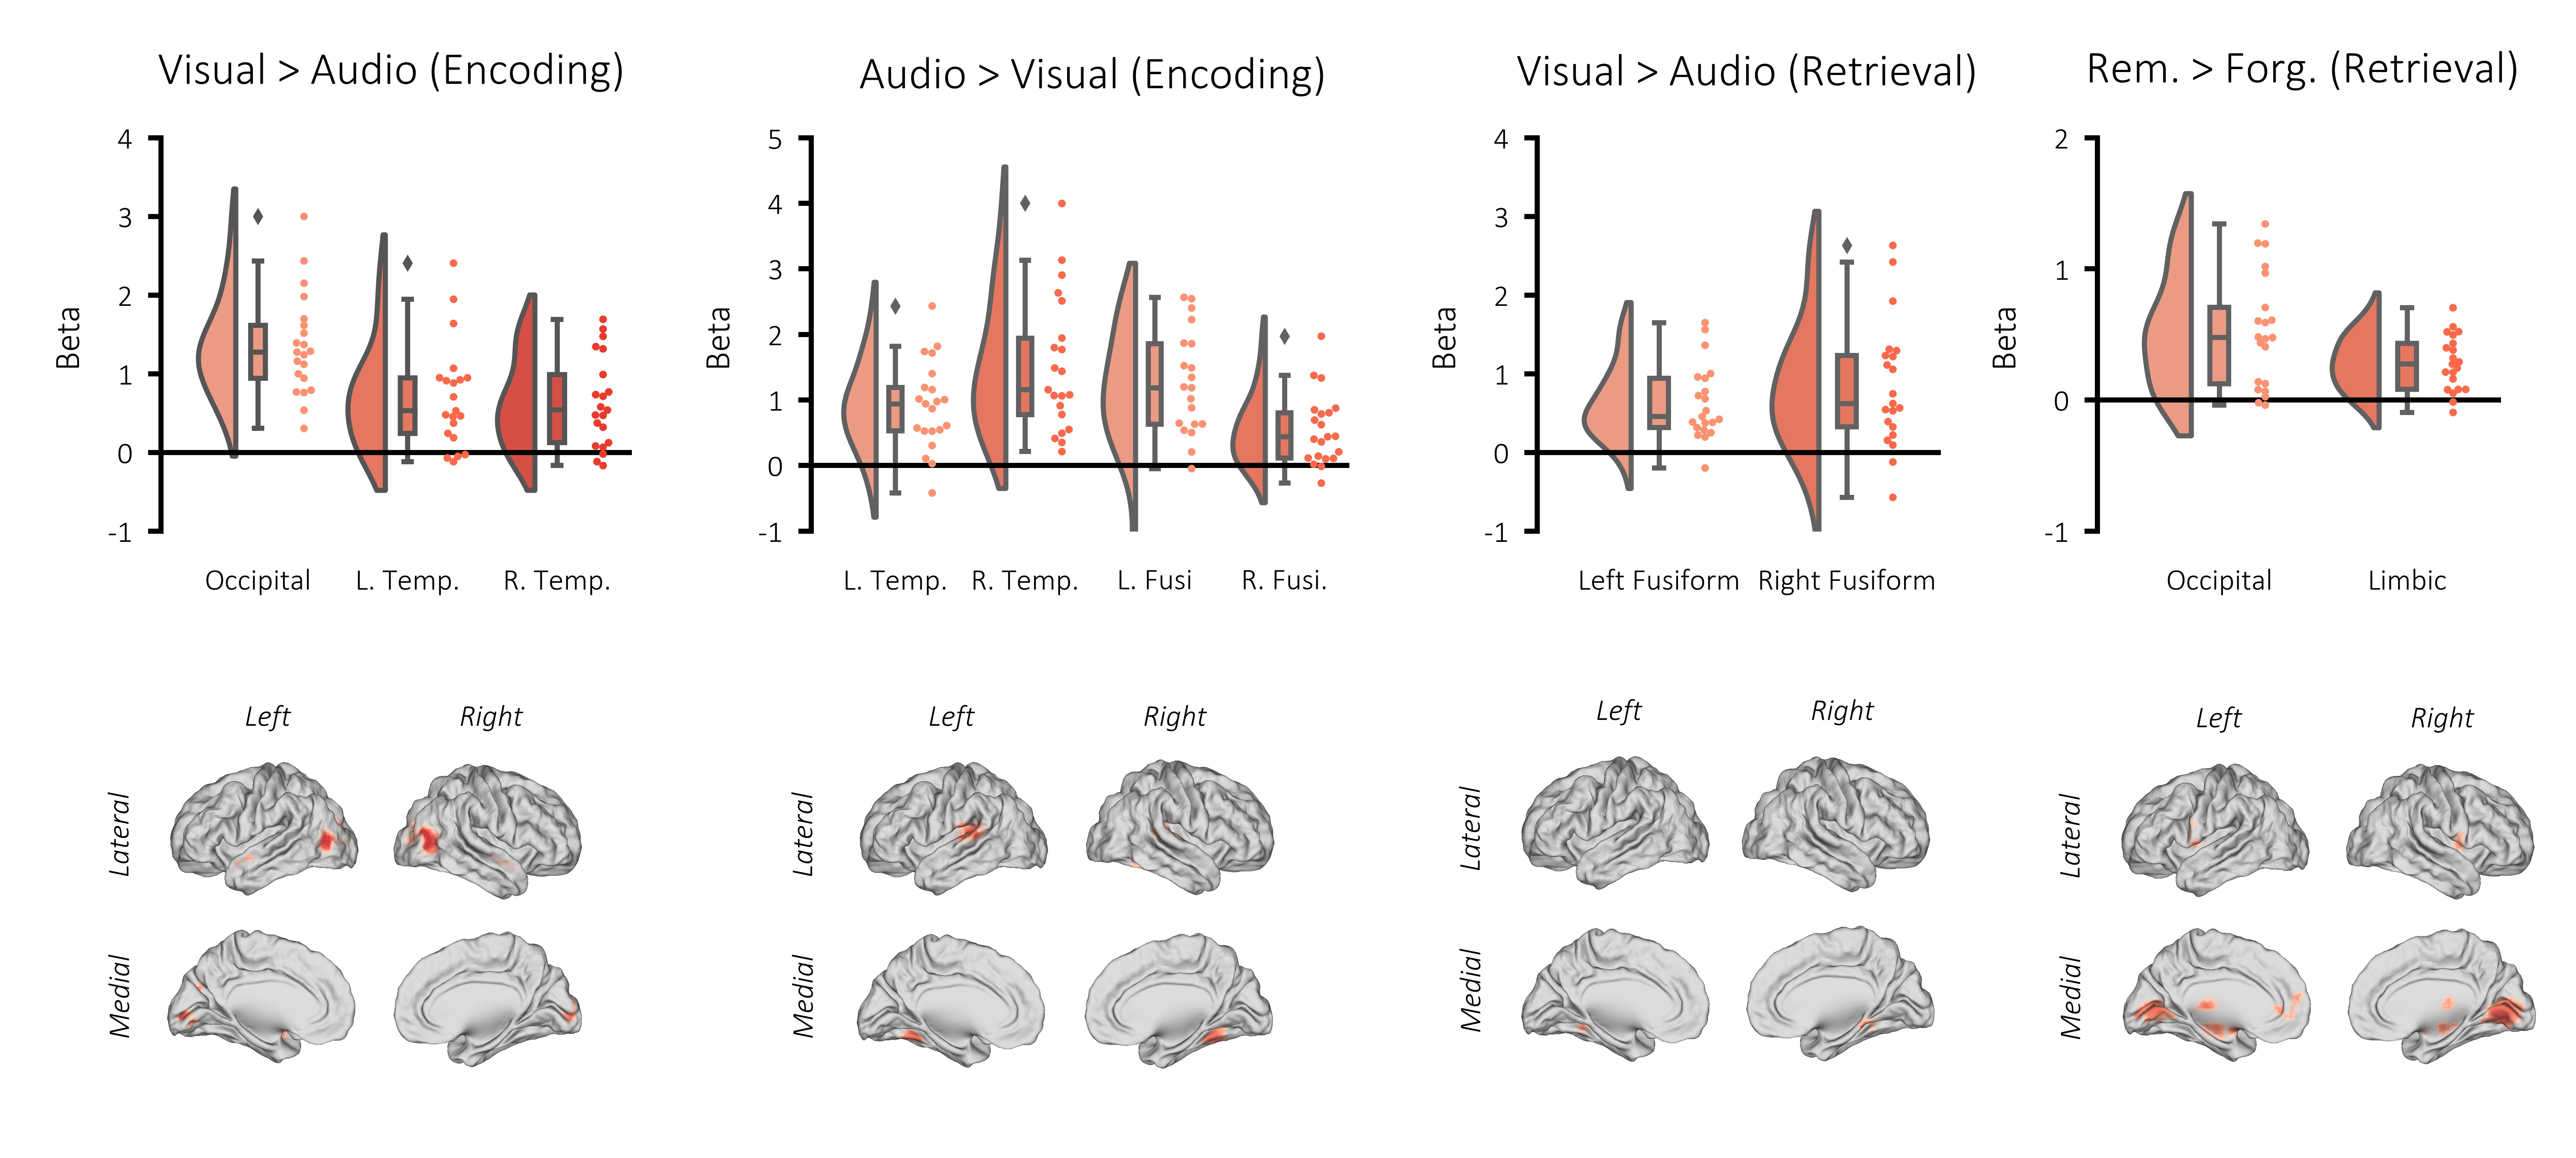

Supplement: supp [file elife-49562-supp-v1.zip › elife_poa_e49562_Figure_2_figure_supplement_1.jpg]

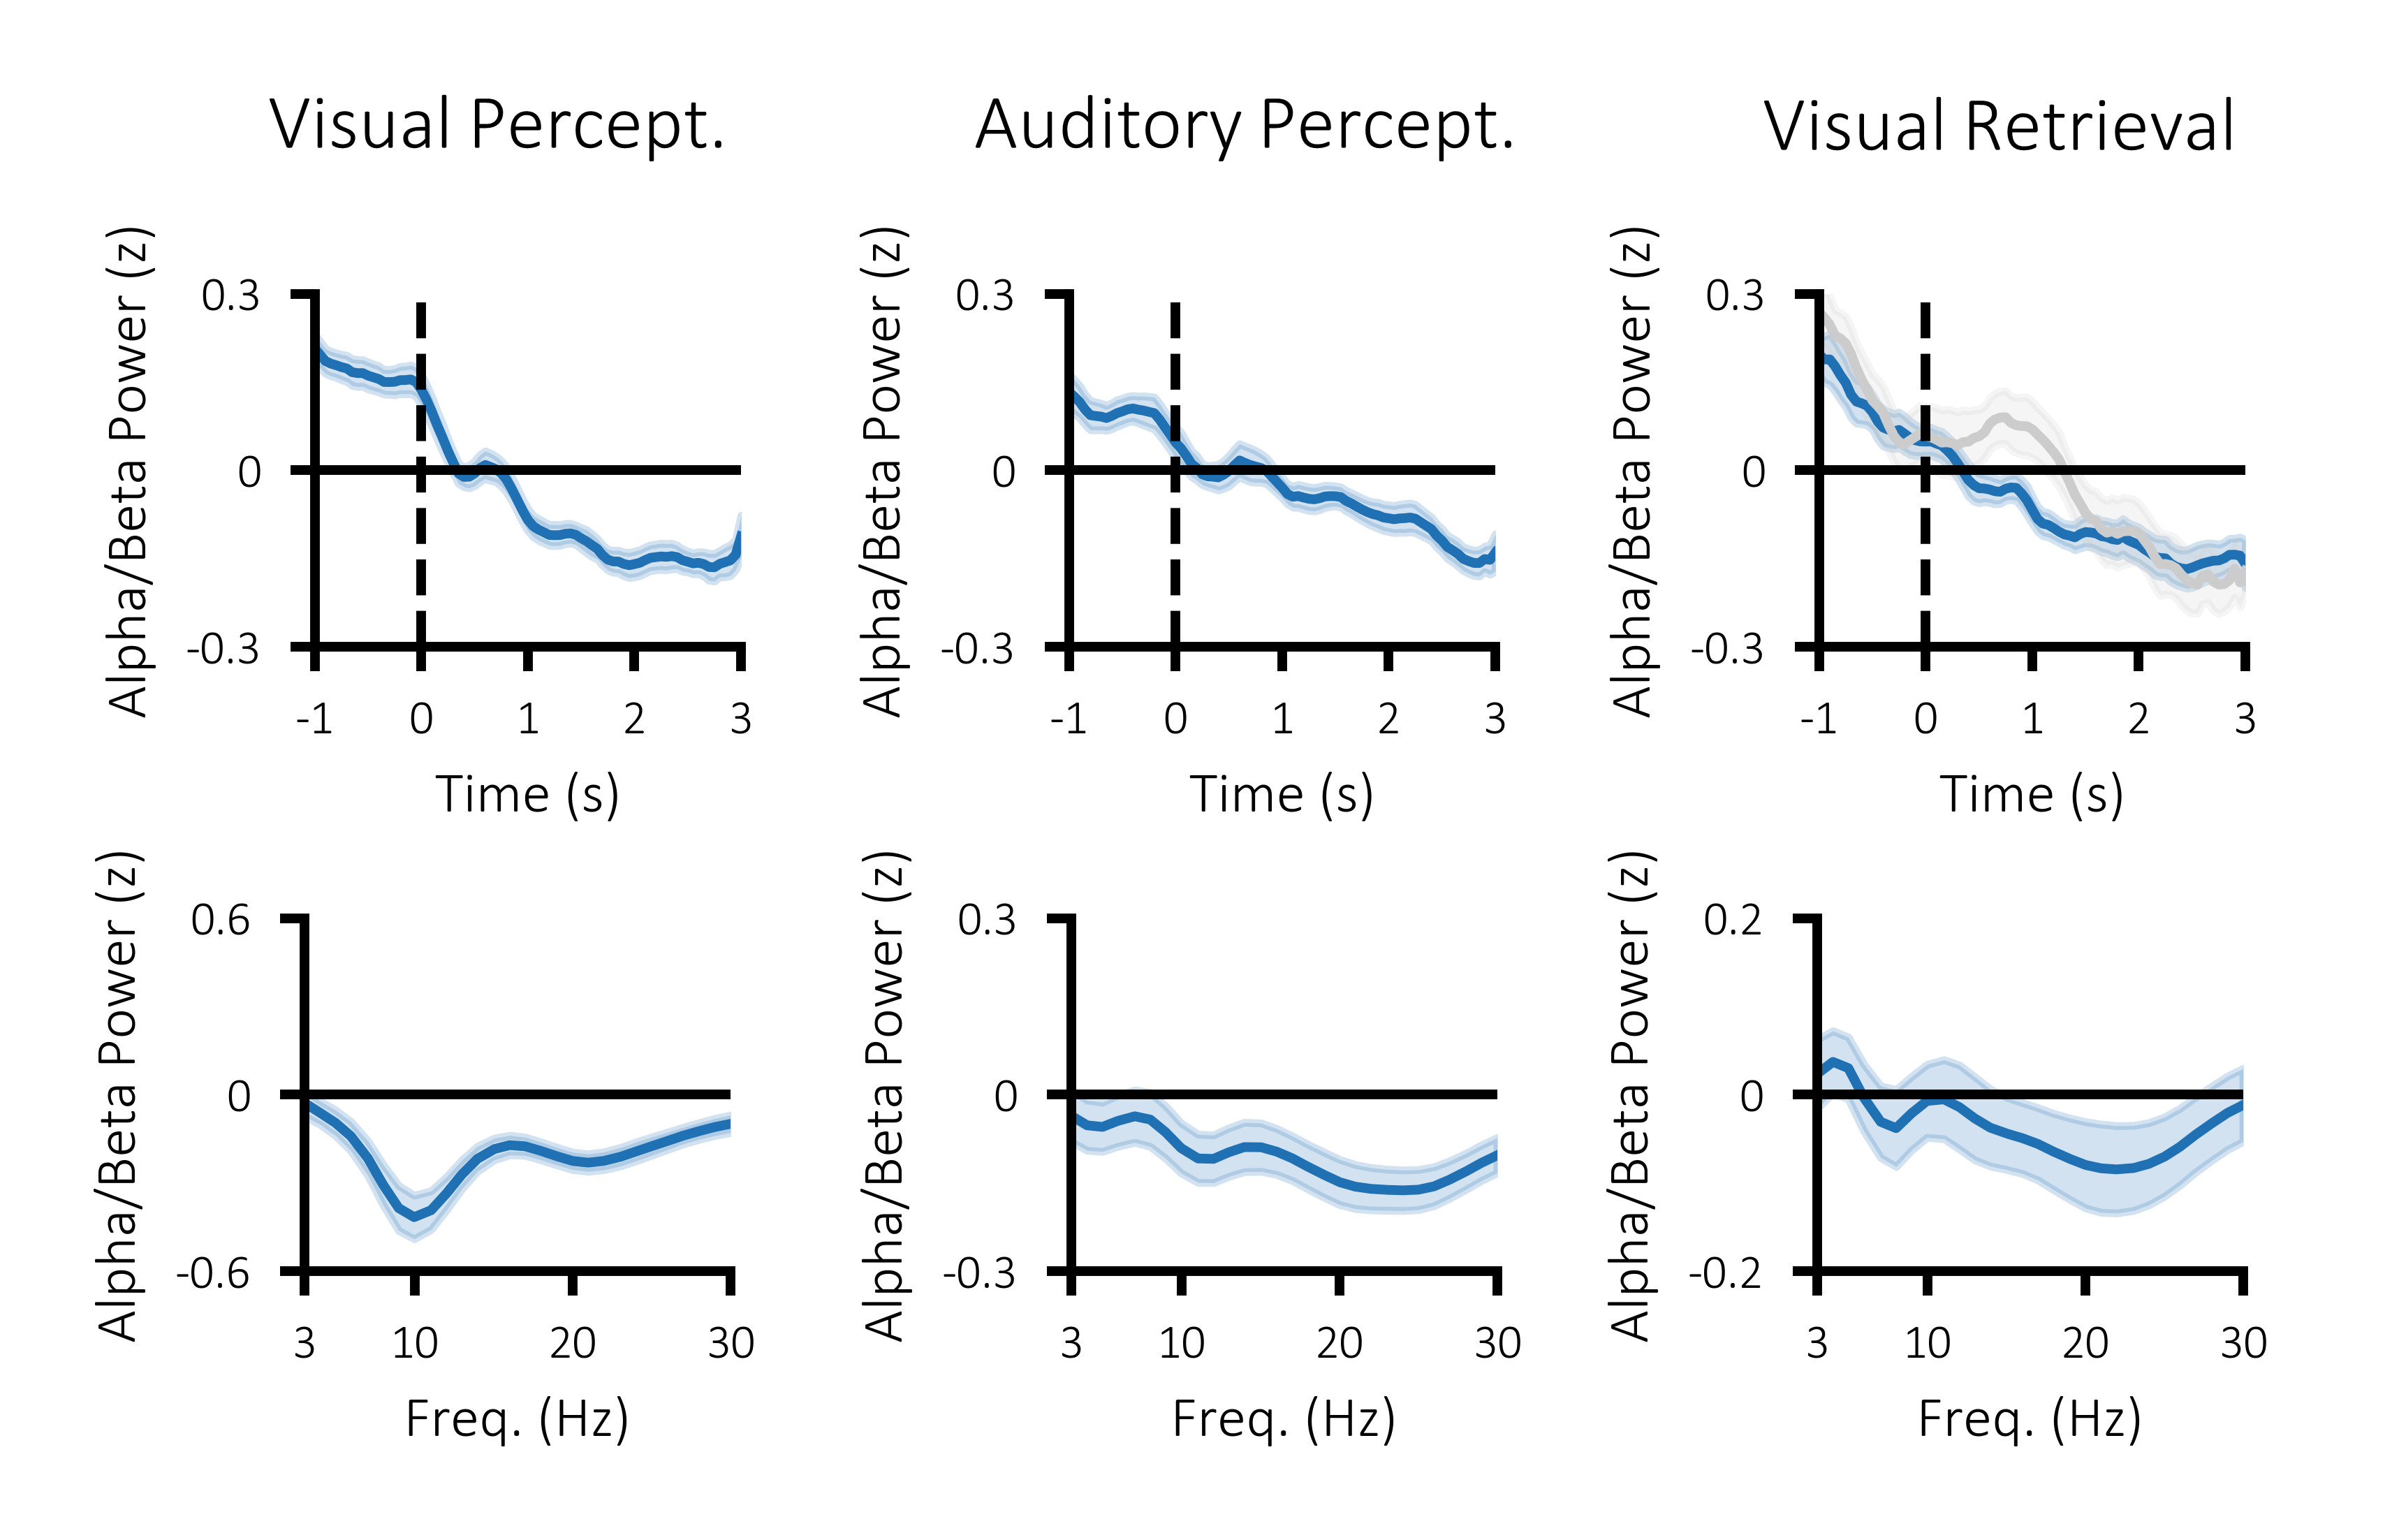

Supplement: supp [file elife-49562-supp-v1.zip › elife_poa_e49562_Figure_3_figure_supplement_1.jpg]

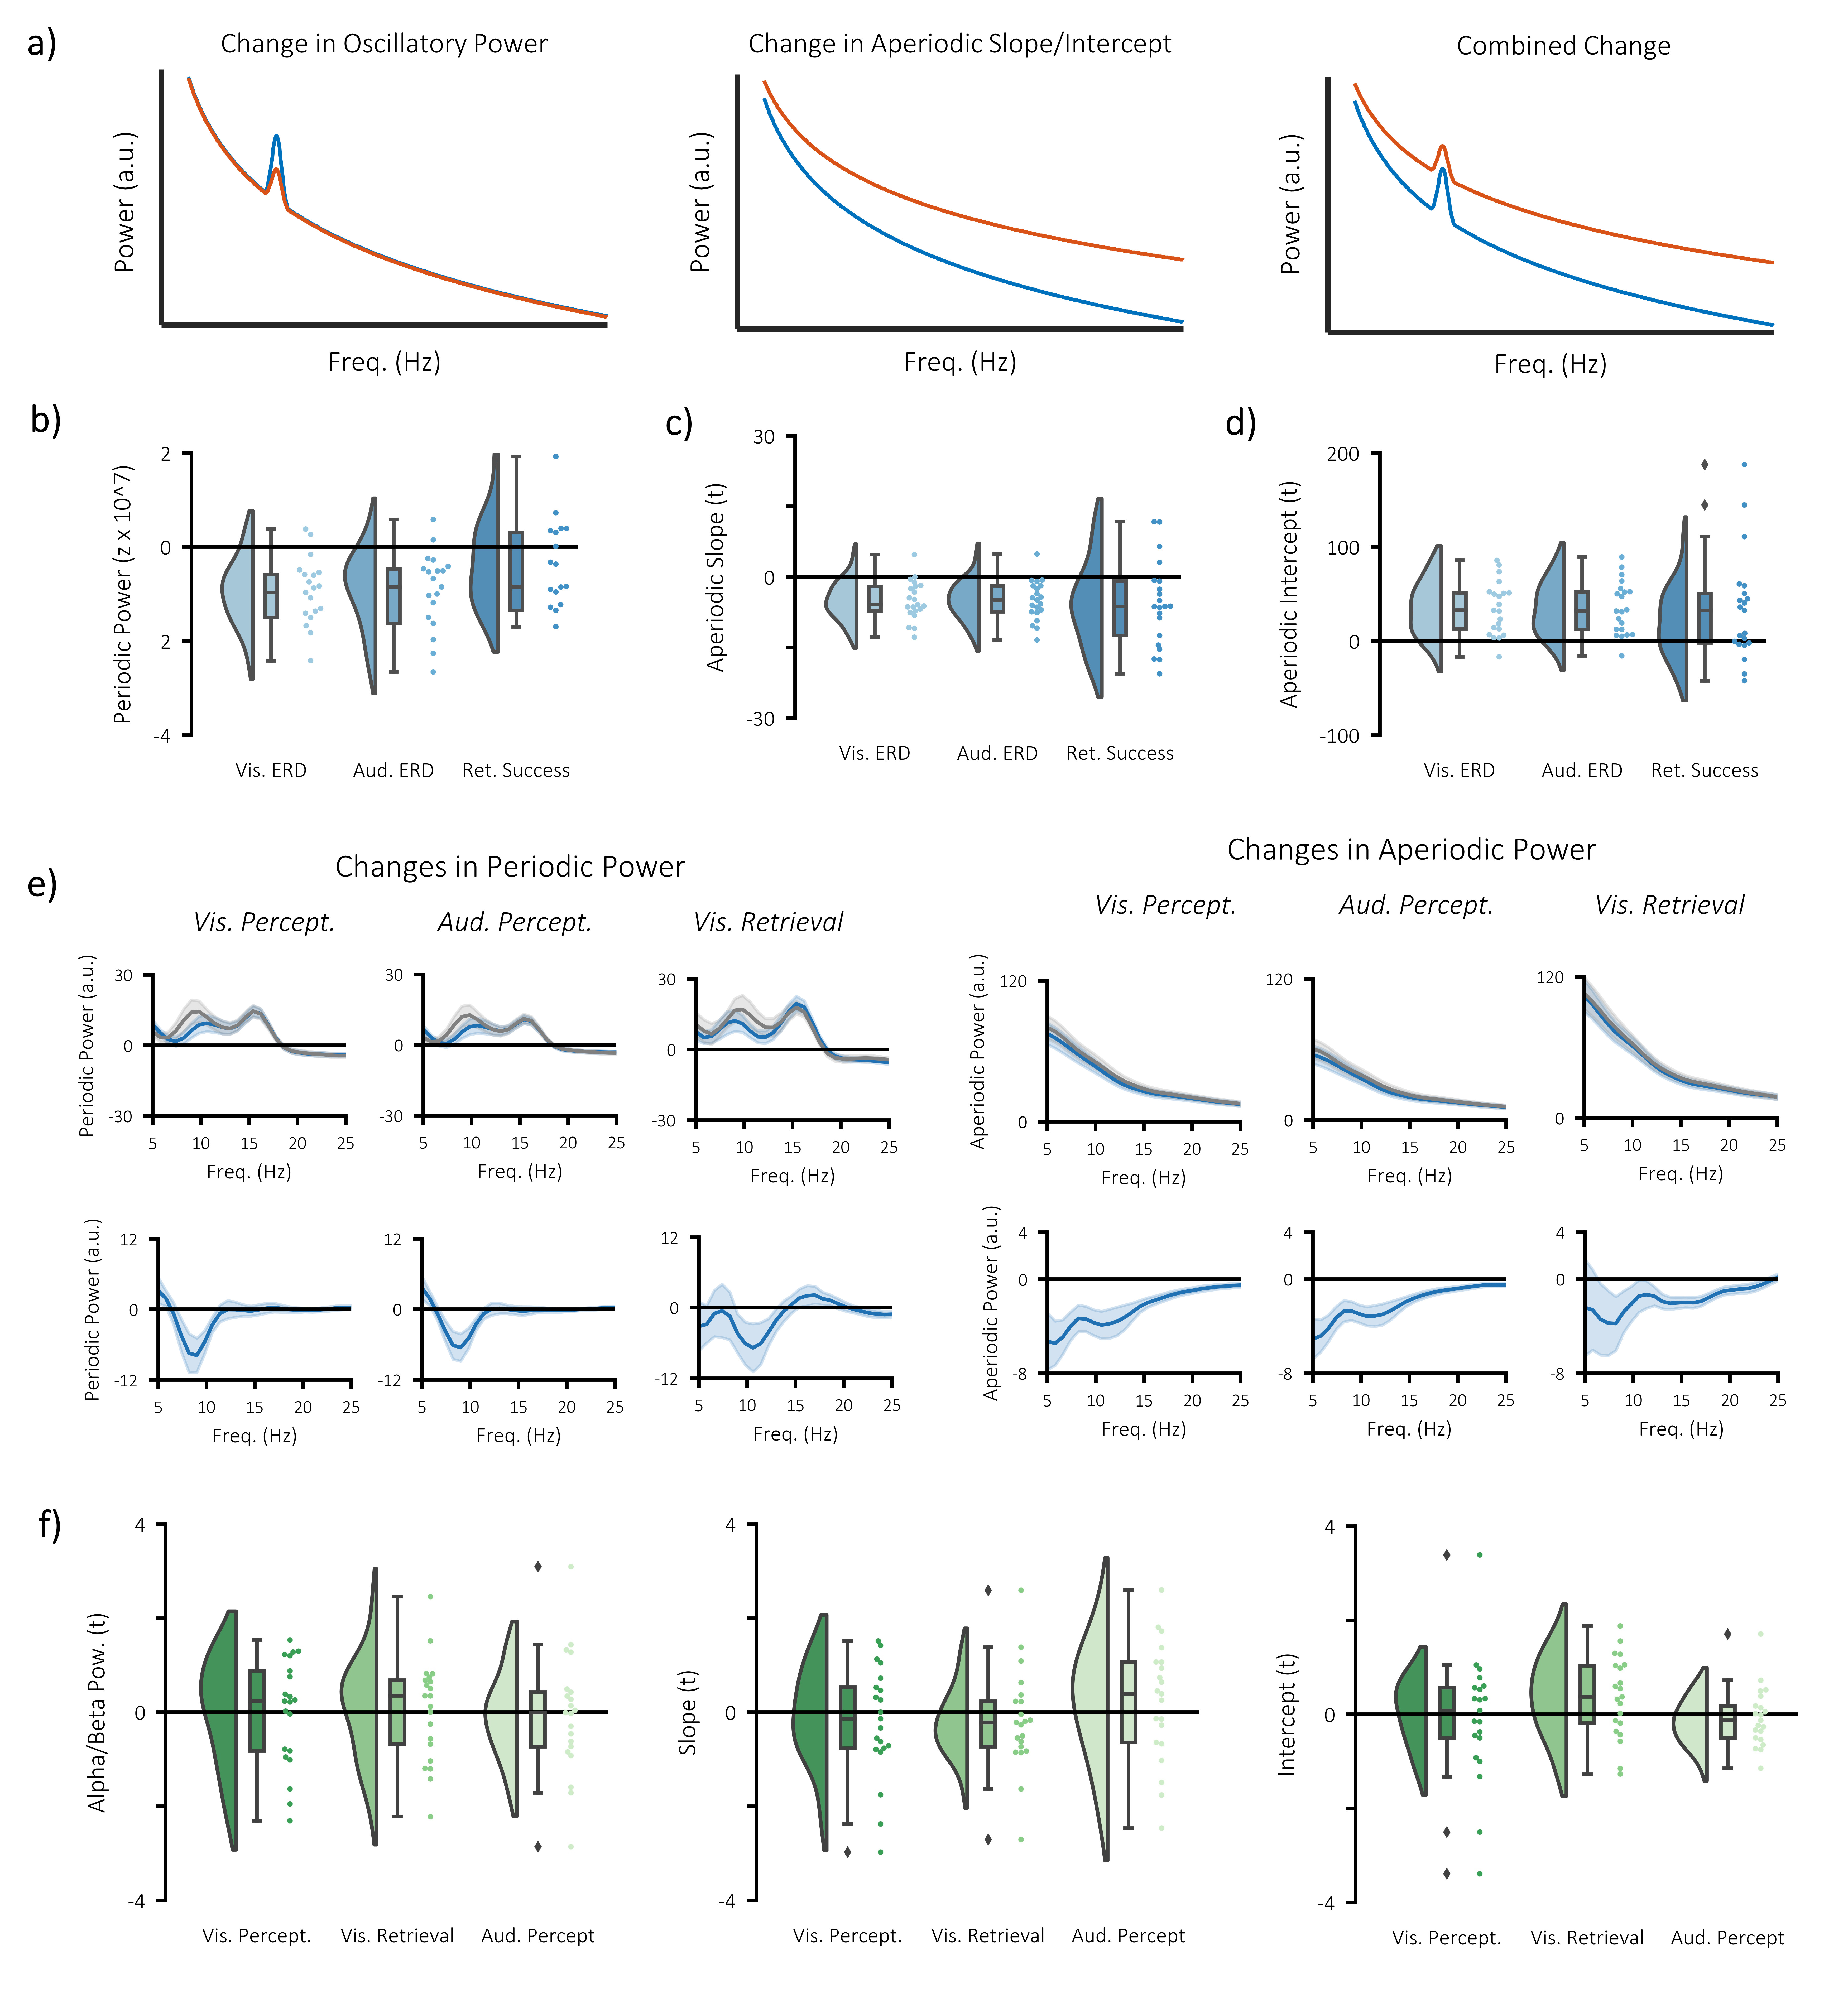

Supplement: supp [file elife-49562-supp-v1.zip › elife_poa_e49562_Figure_4_figure_supplement_4.jpg]

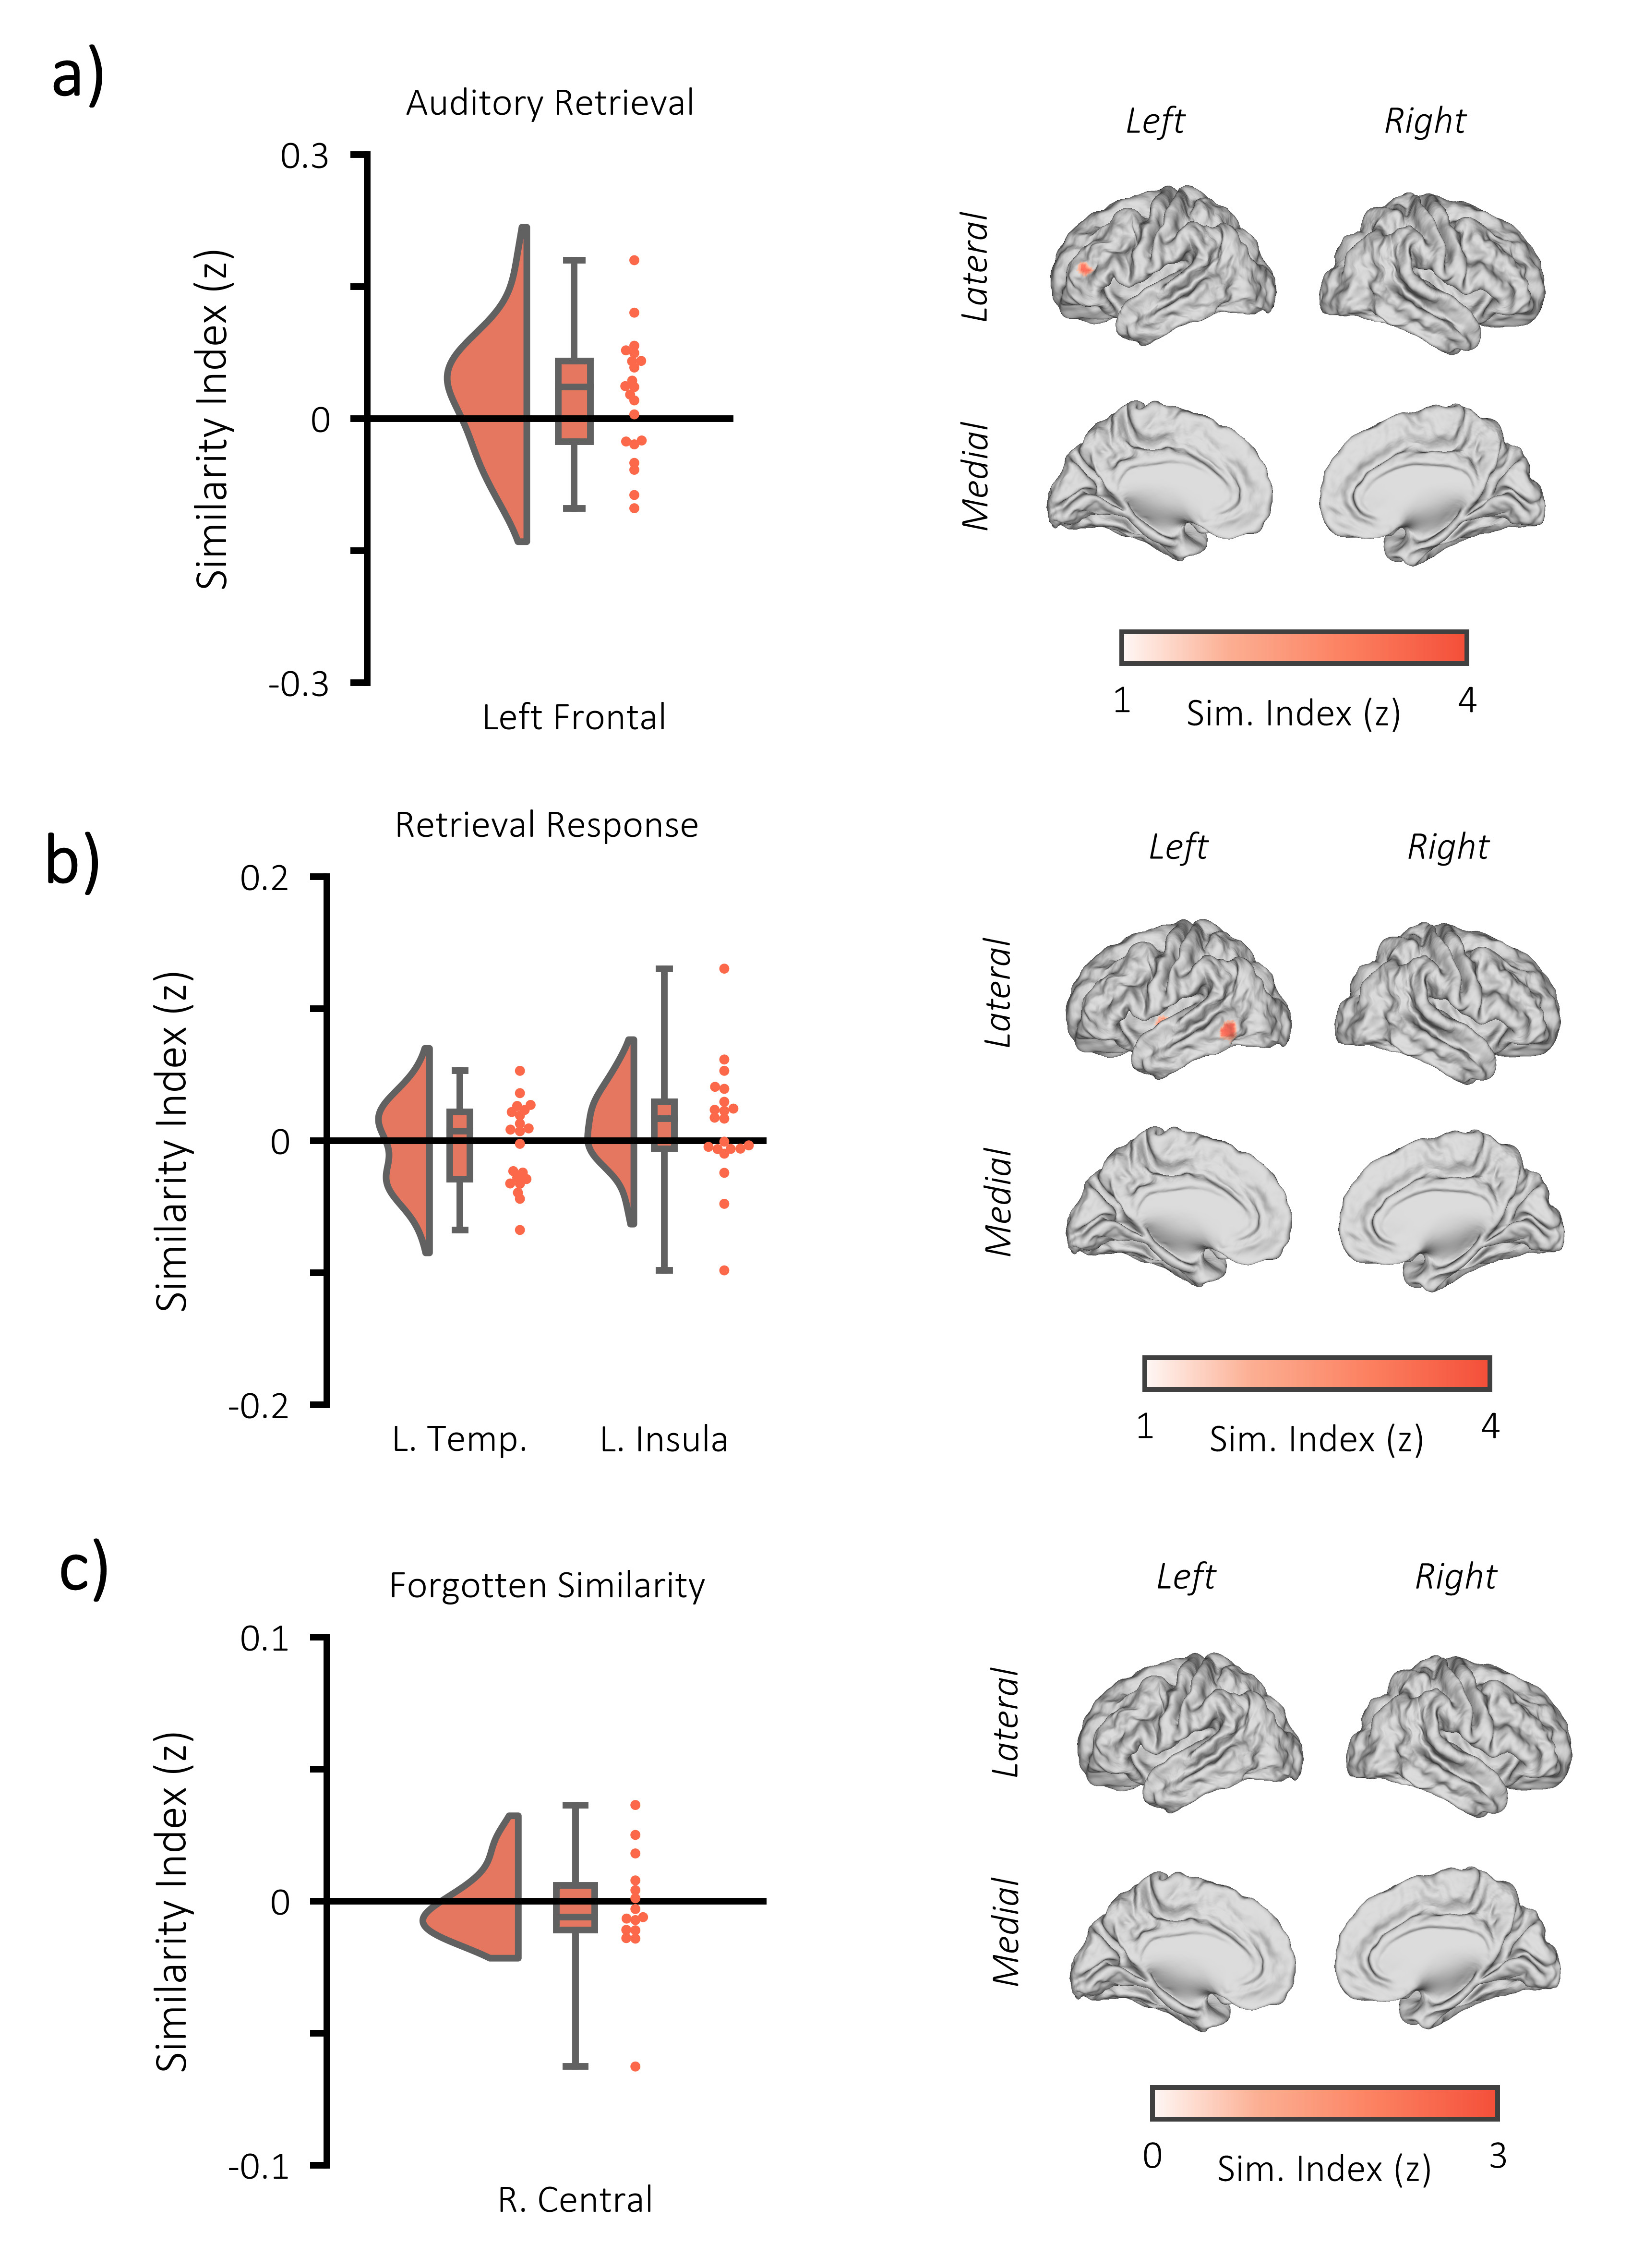

Supplement: supp [file elife-49562-supp-v1.zip › elife_poa_e49562_Figure_2_figure_supplement_2.jpg]

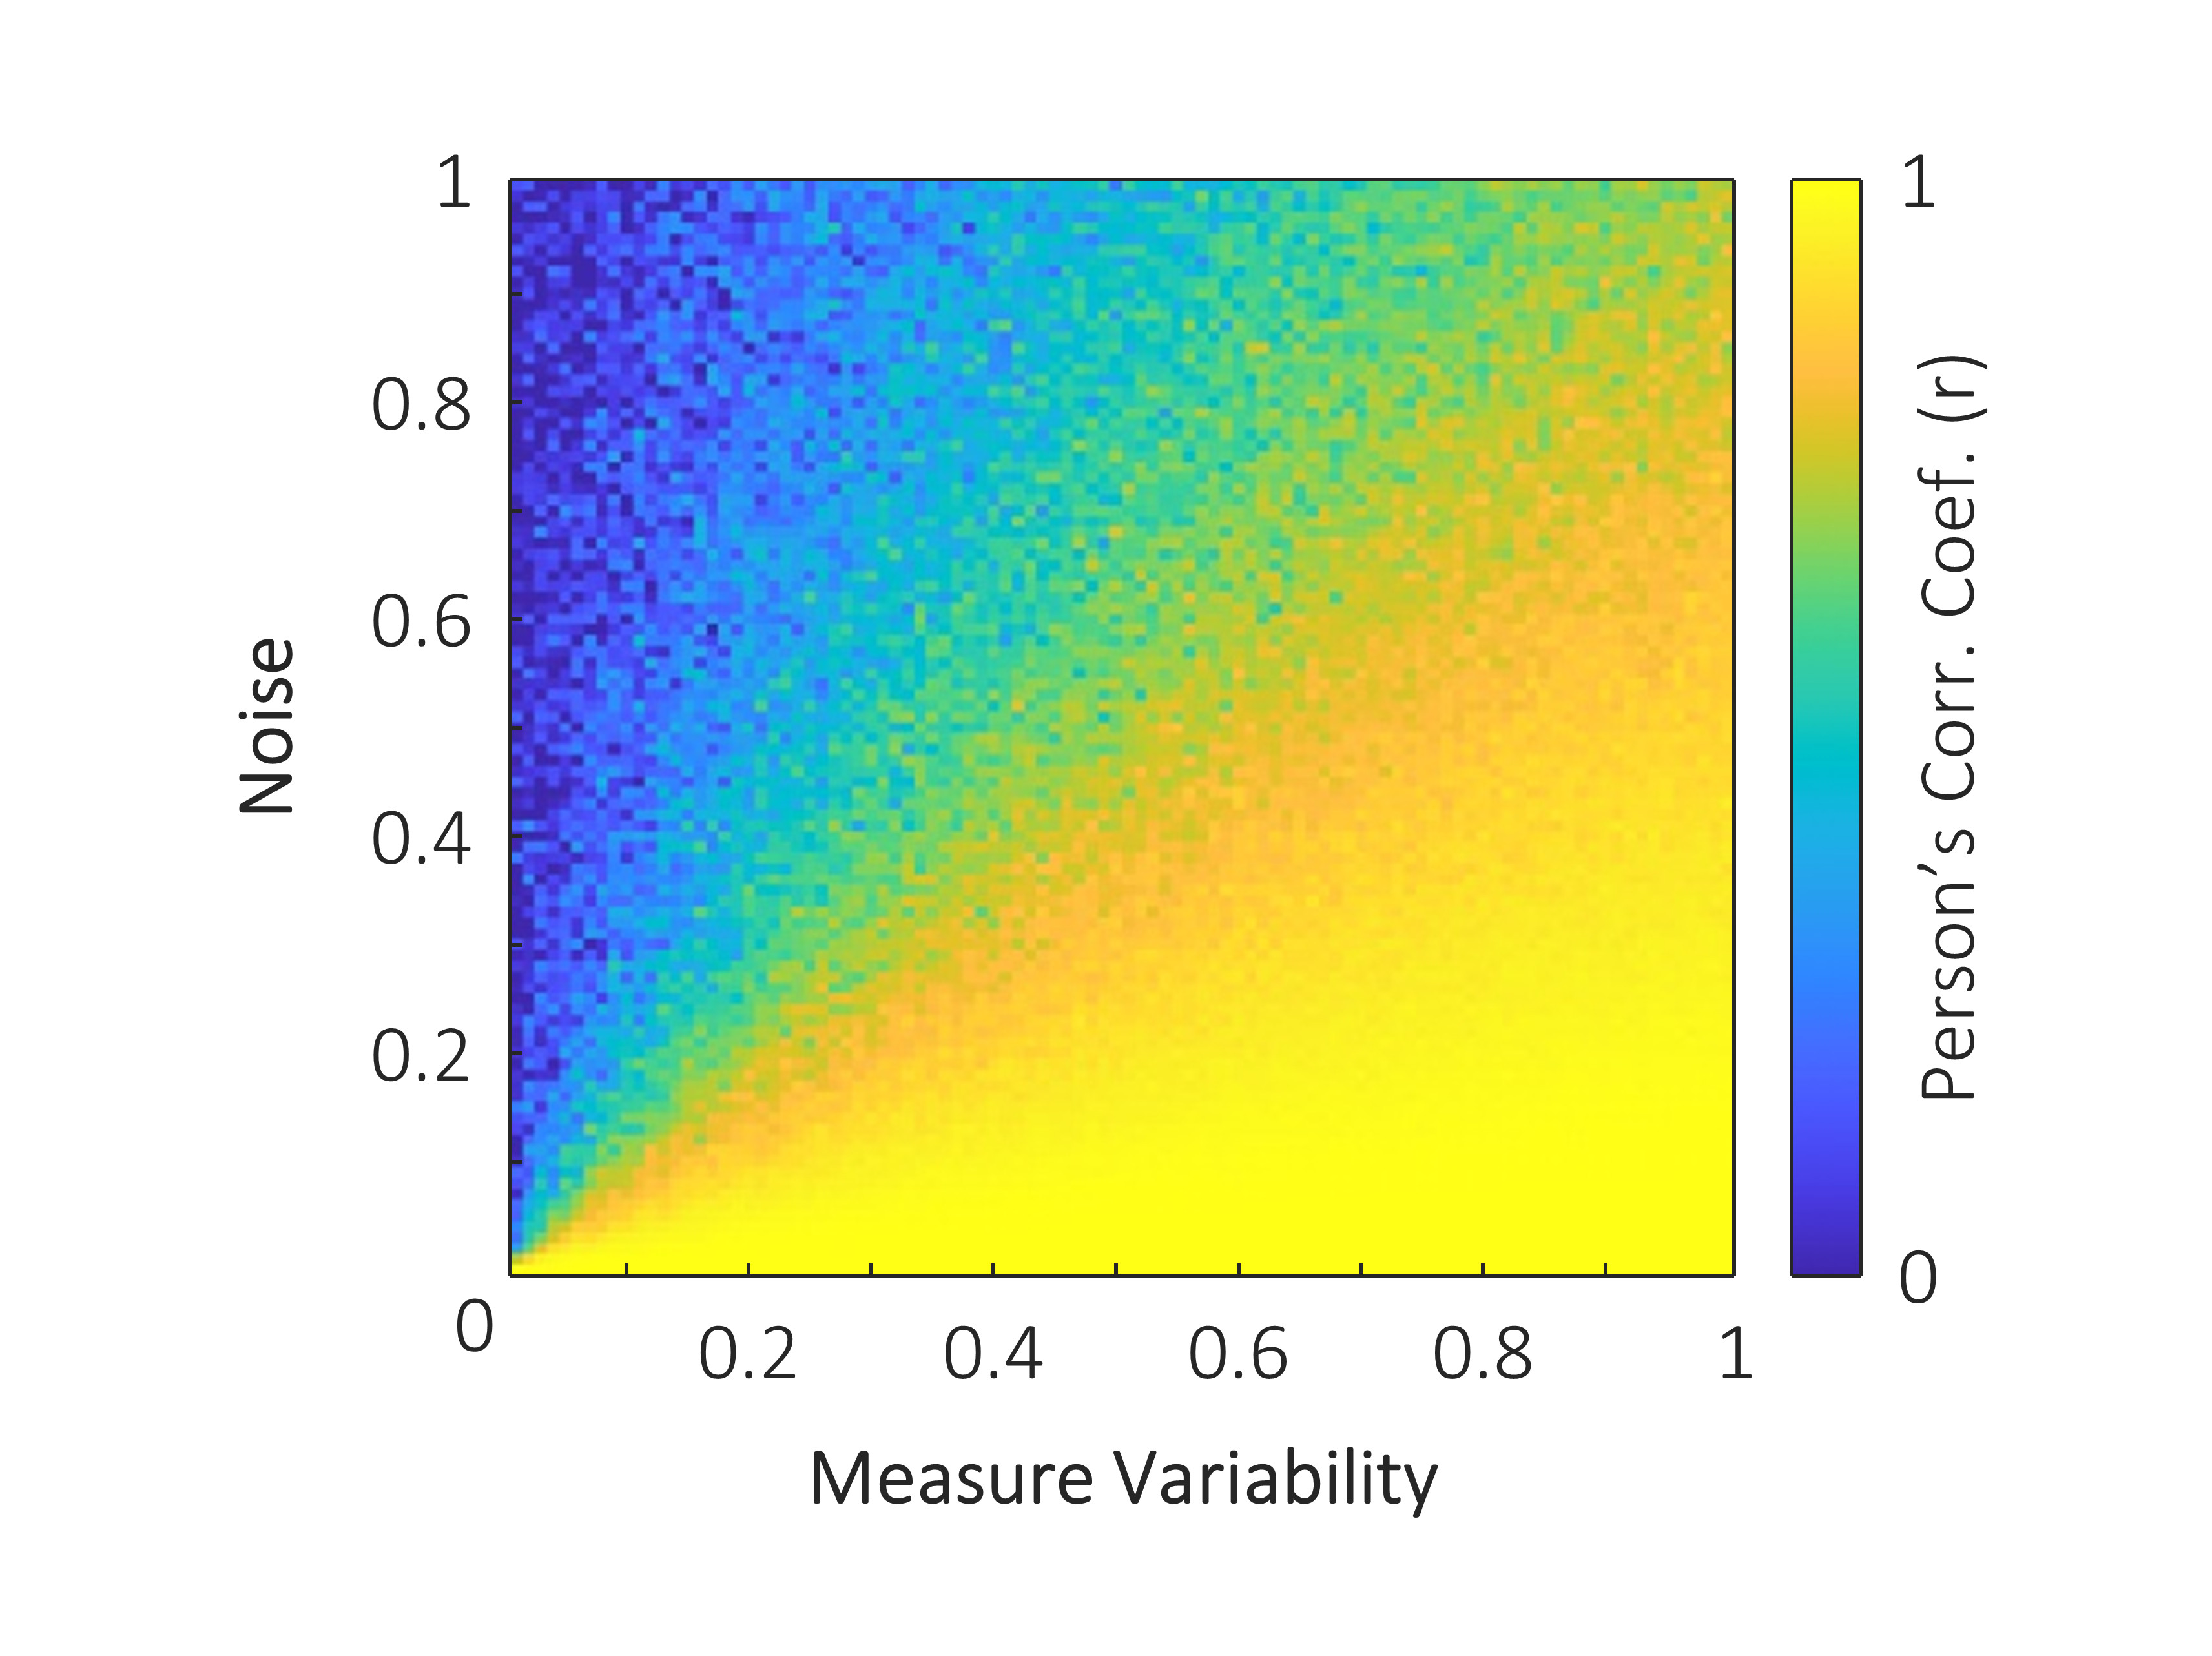

Supplement: supp [file elife-49562-supp-v1.zip › elife_poa_e49562_Figure_4_figure_supplement_6.jpg]

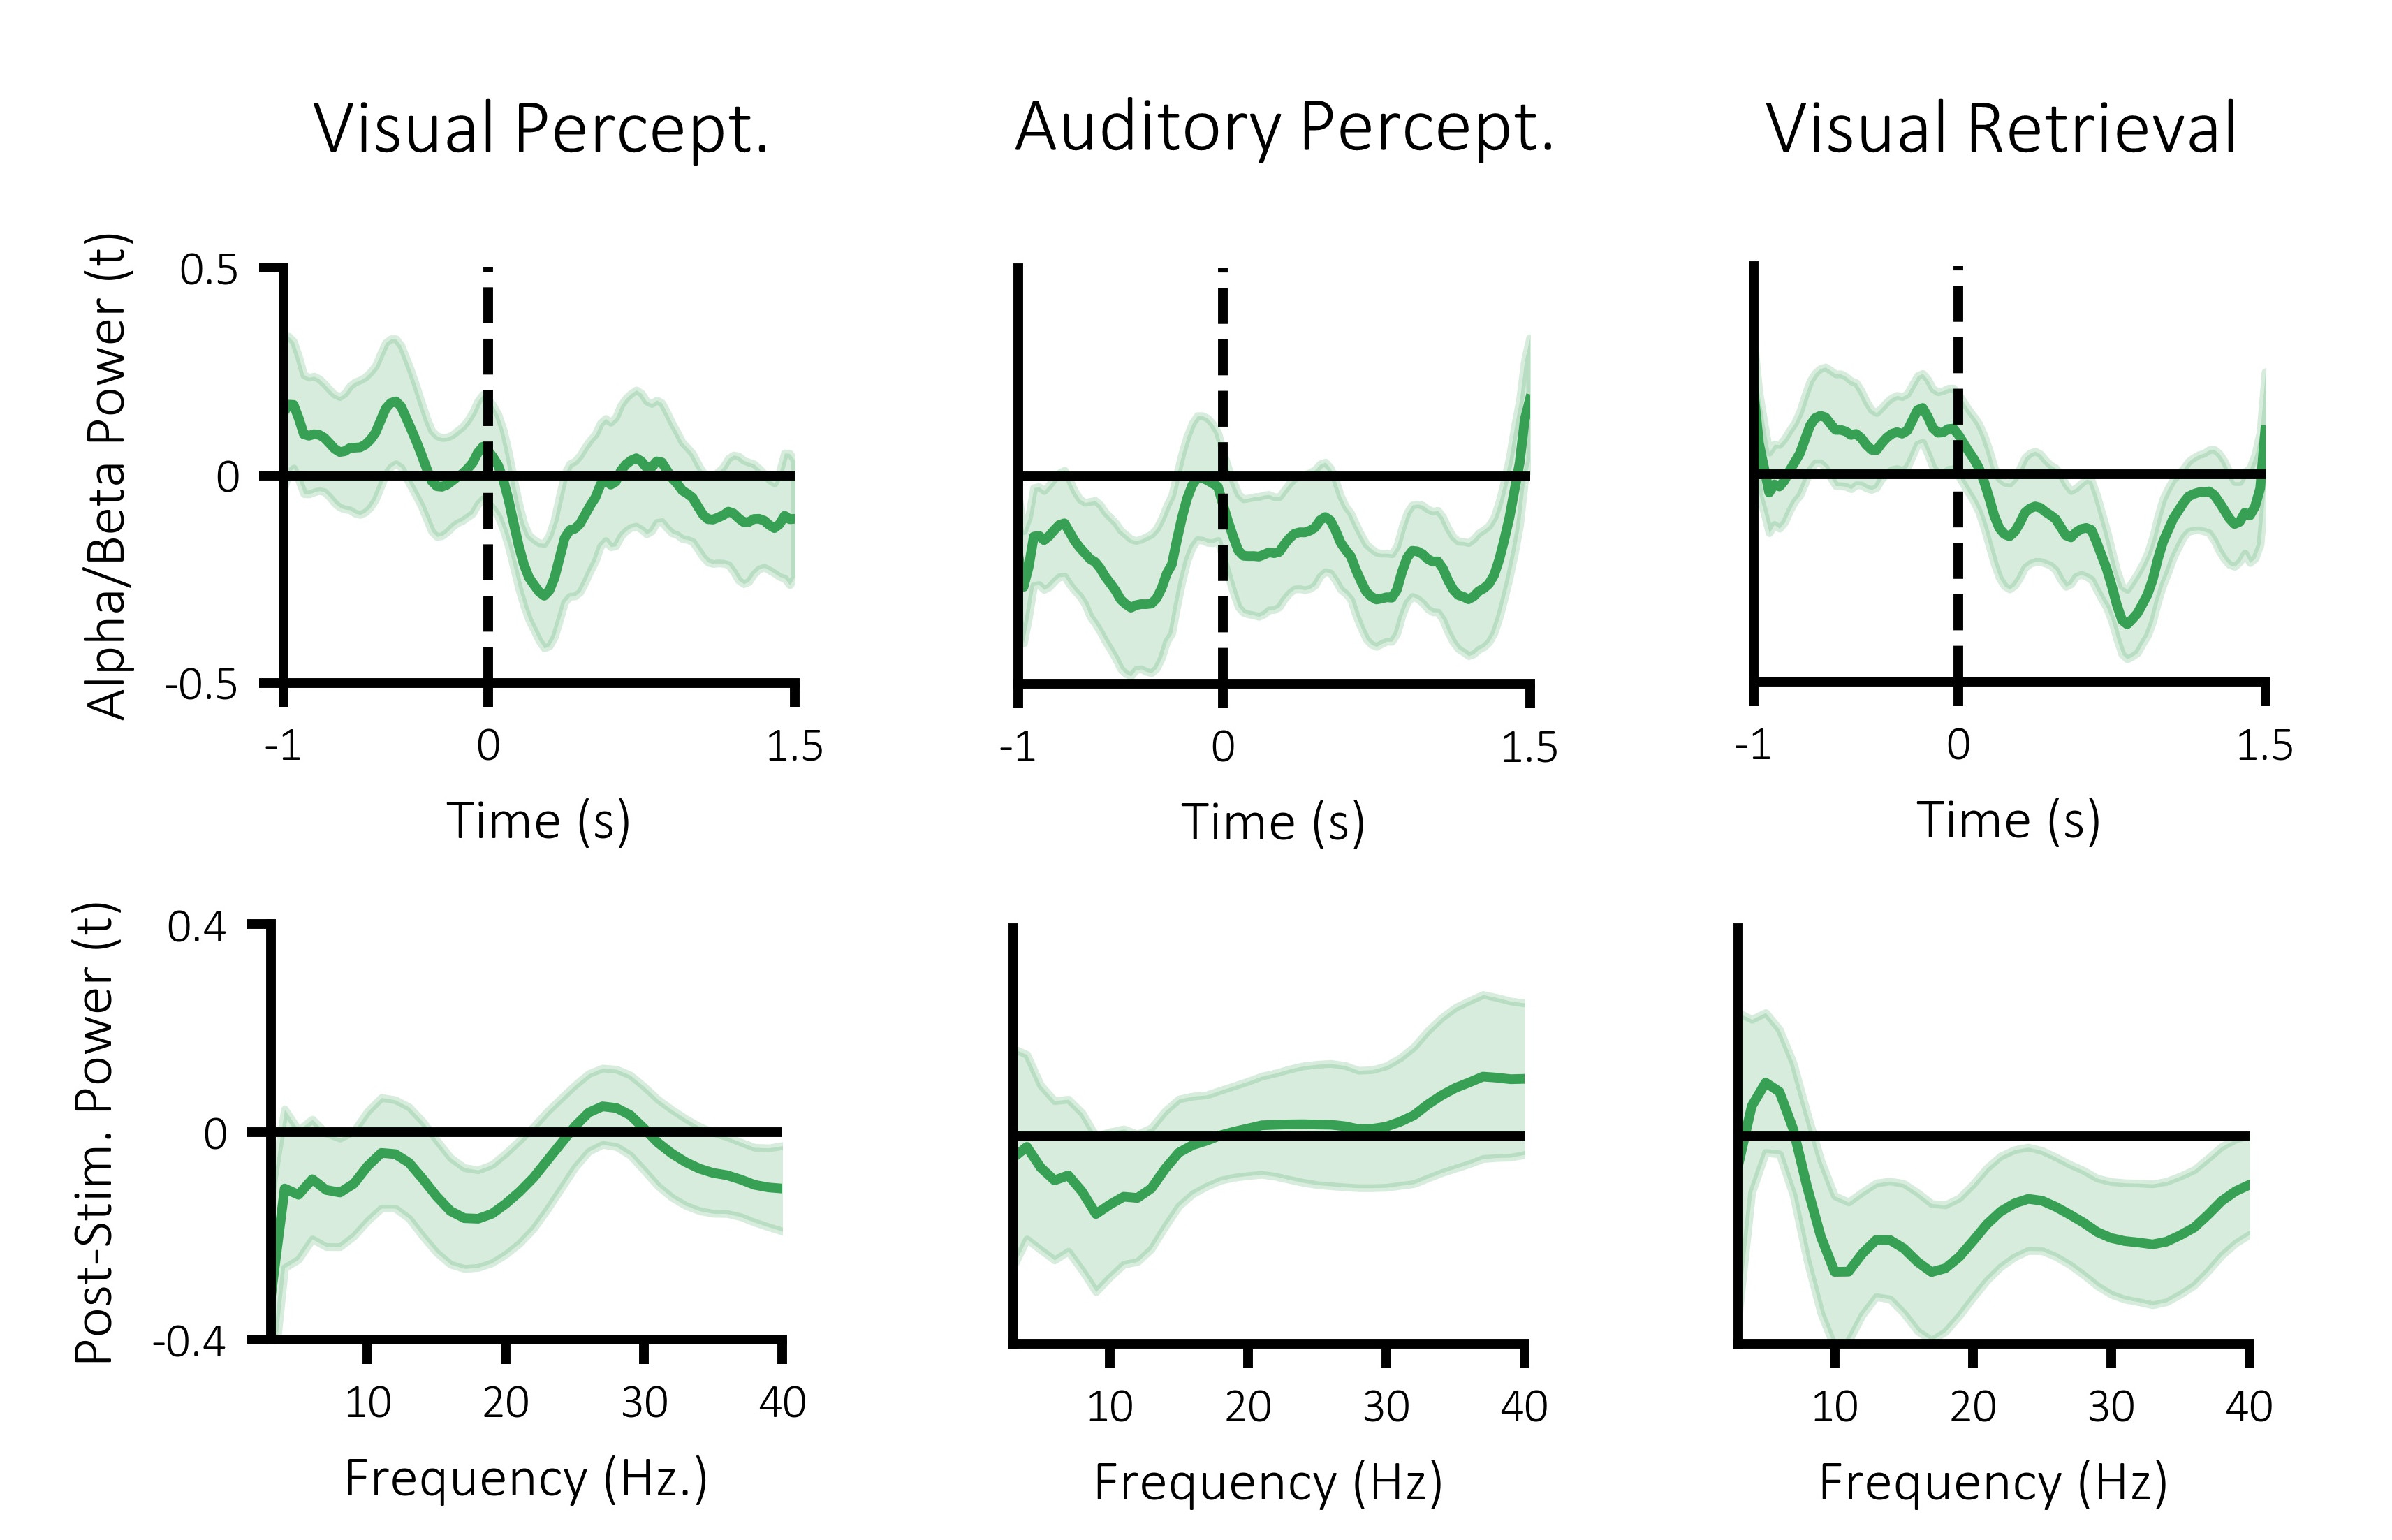

Supplement: supp [file elife-49562-supp-v1.zip › elife_poa_e49562_Figure_4_figure_supplement_2.jpg]

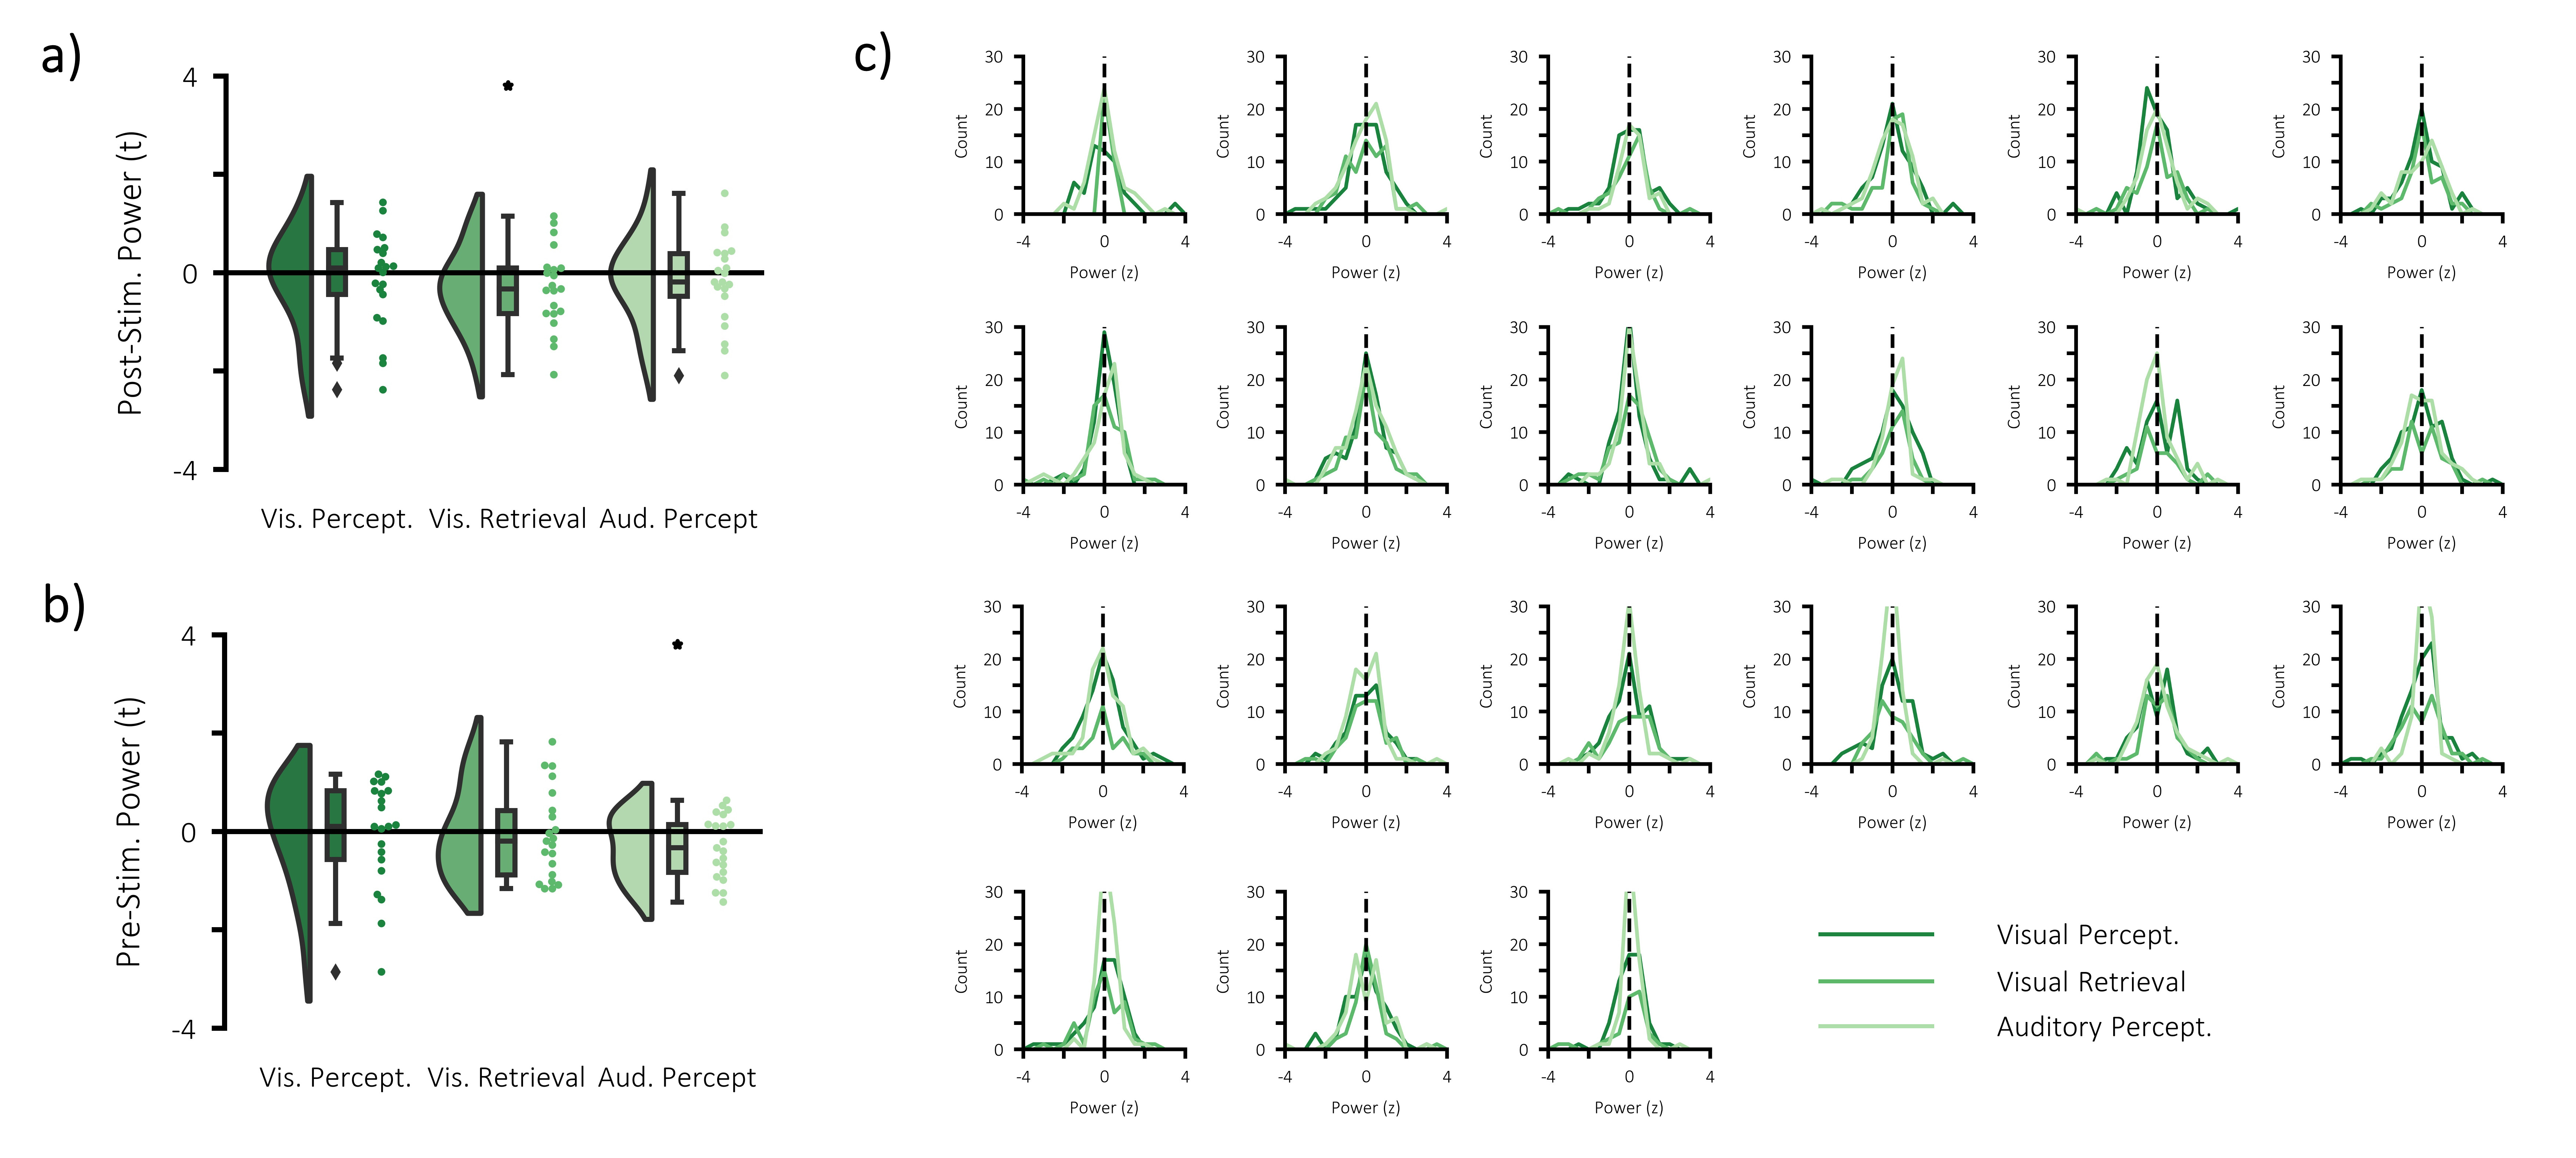

Supplement: supp [file elife-49562-supp-v1.zip › elife_poa_e49562_Figure_4_figure_supplement_3.jpg]

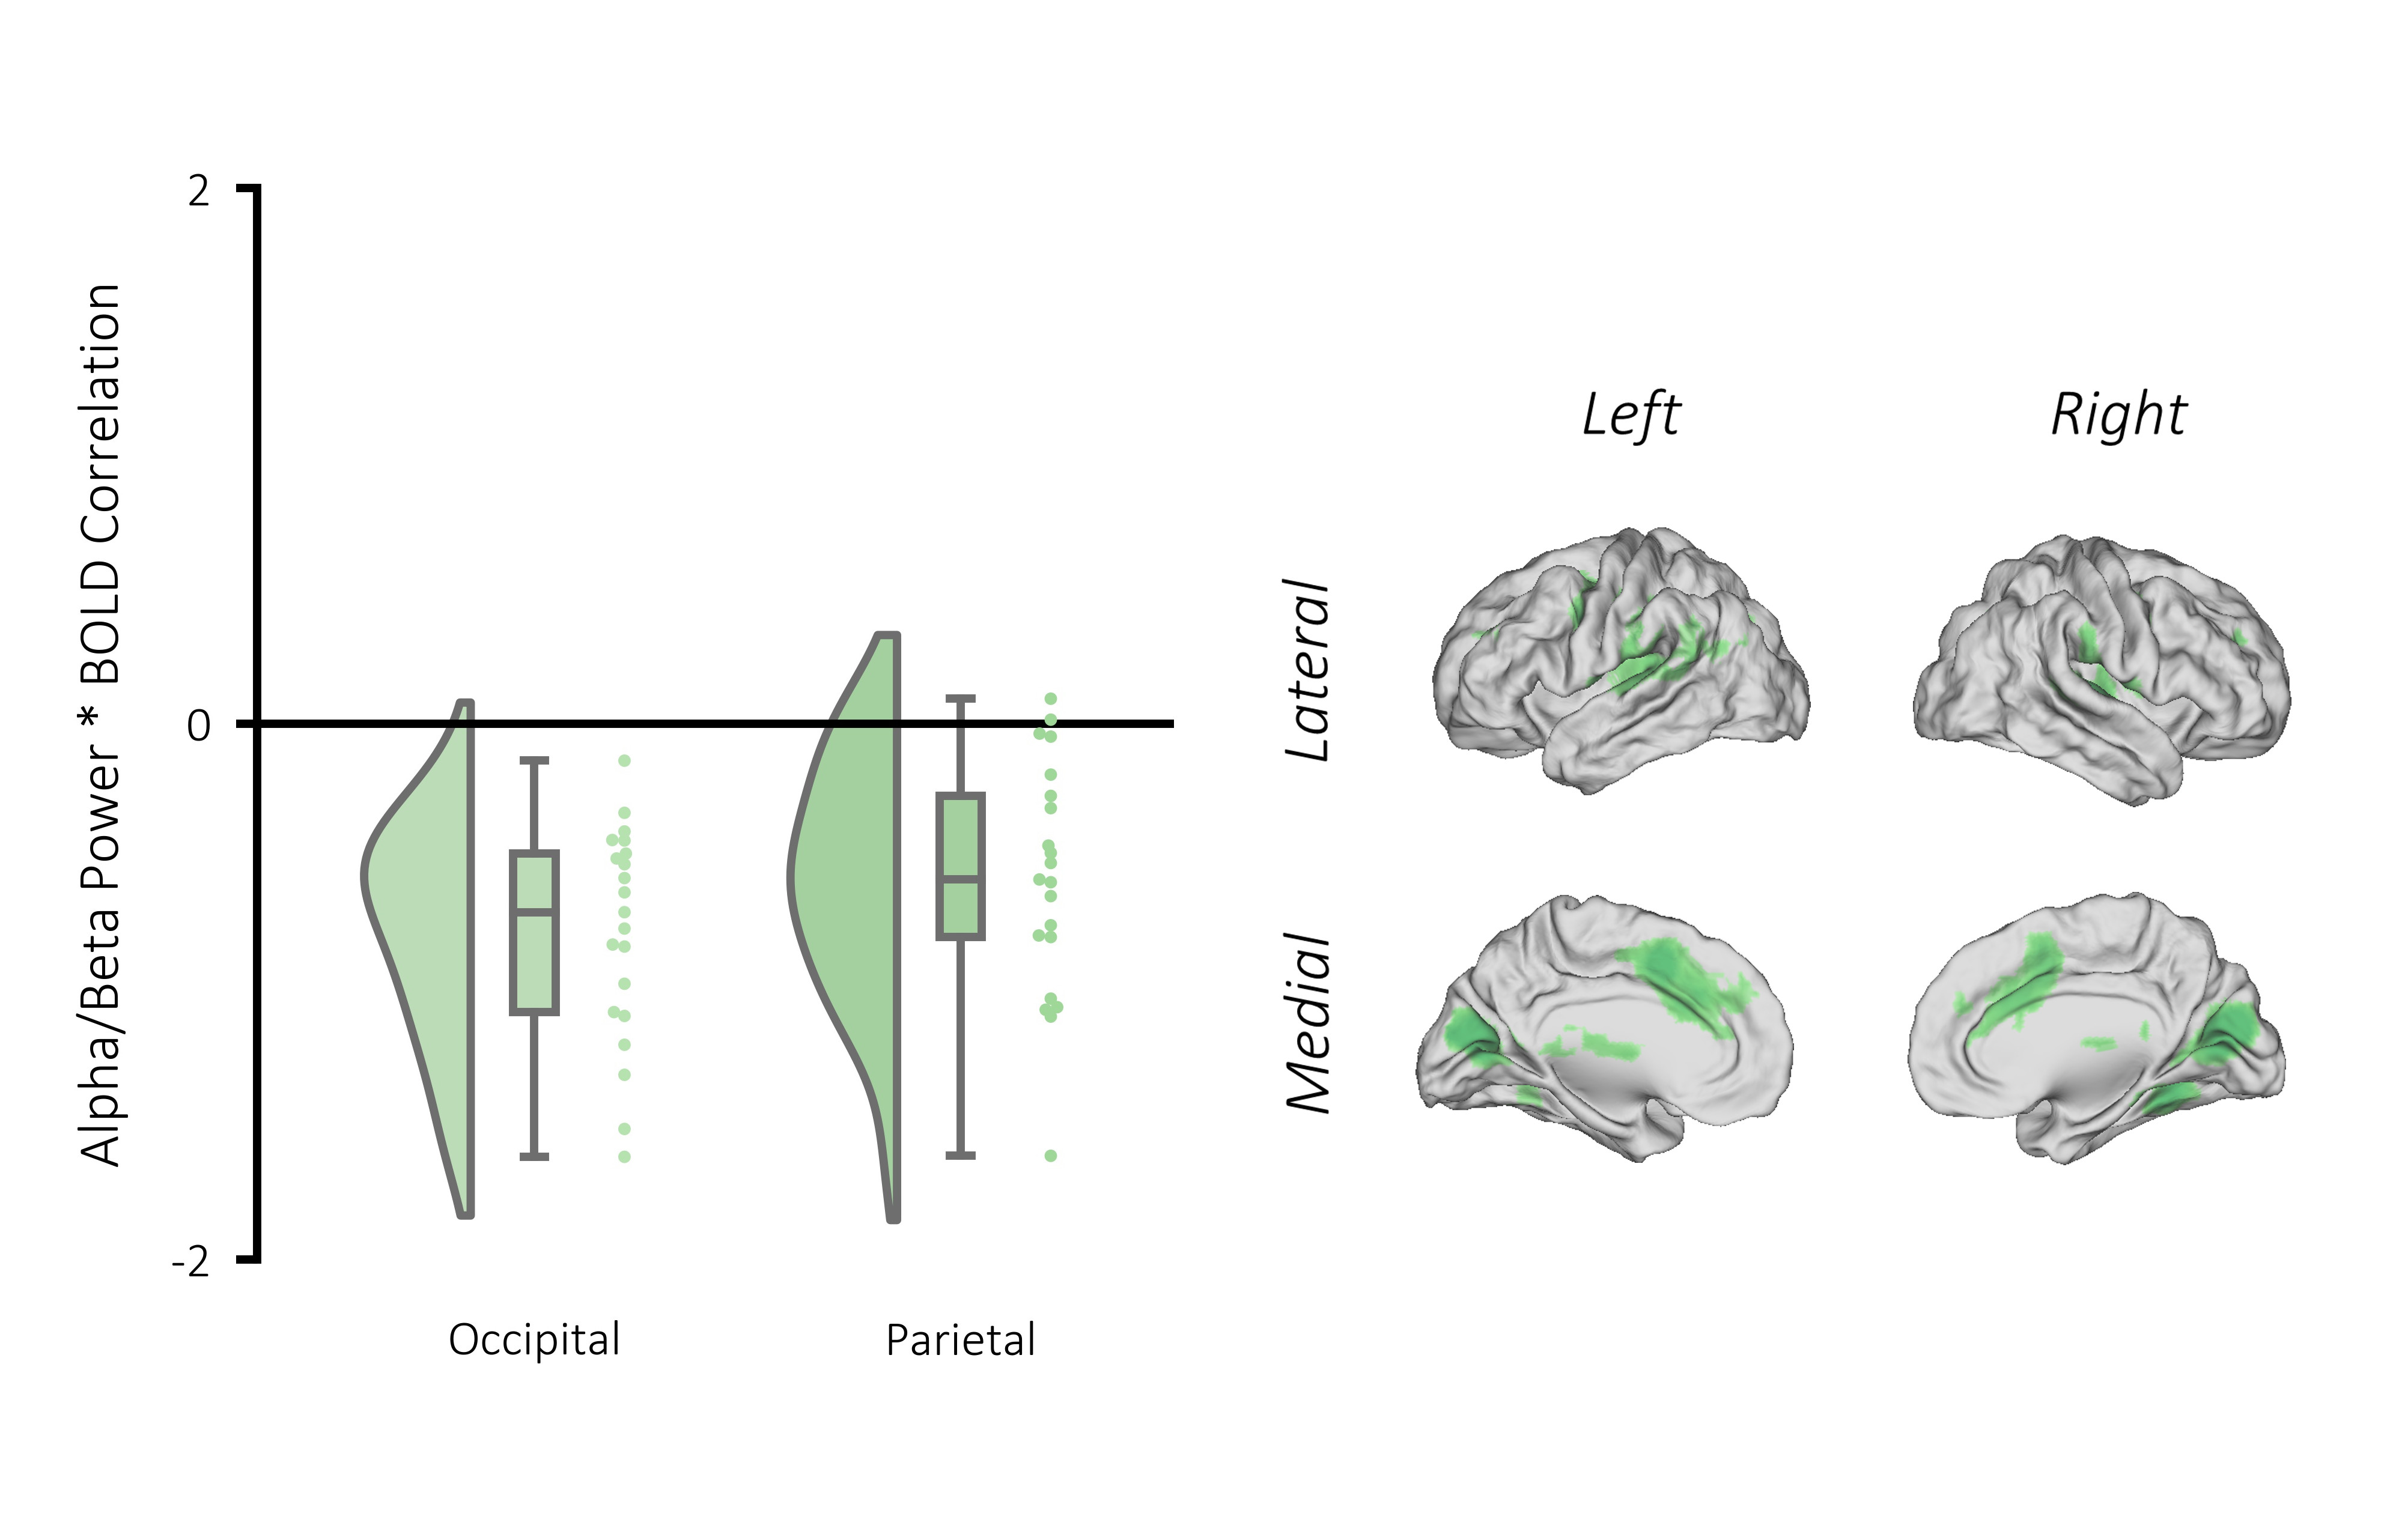

Supplement: supp [file elife-49562-supp-v1.zip › elife_poa_e49562_Figure_4_figure_supplement_1.jpg]

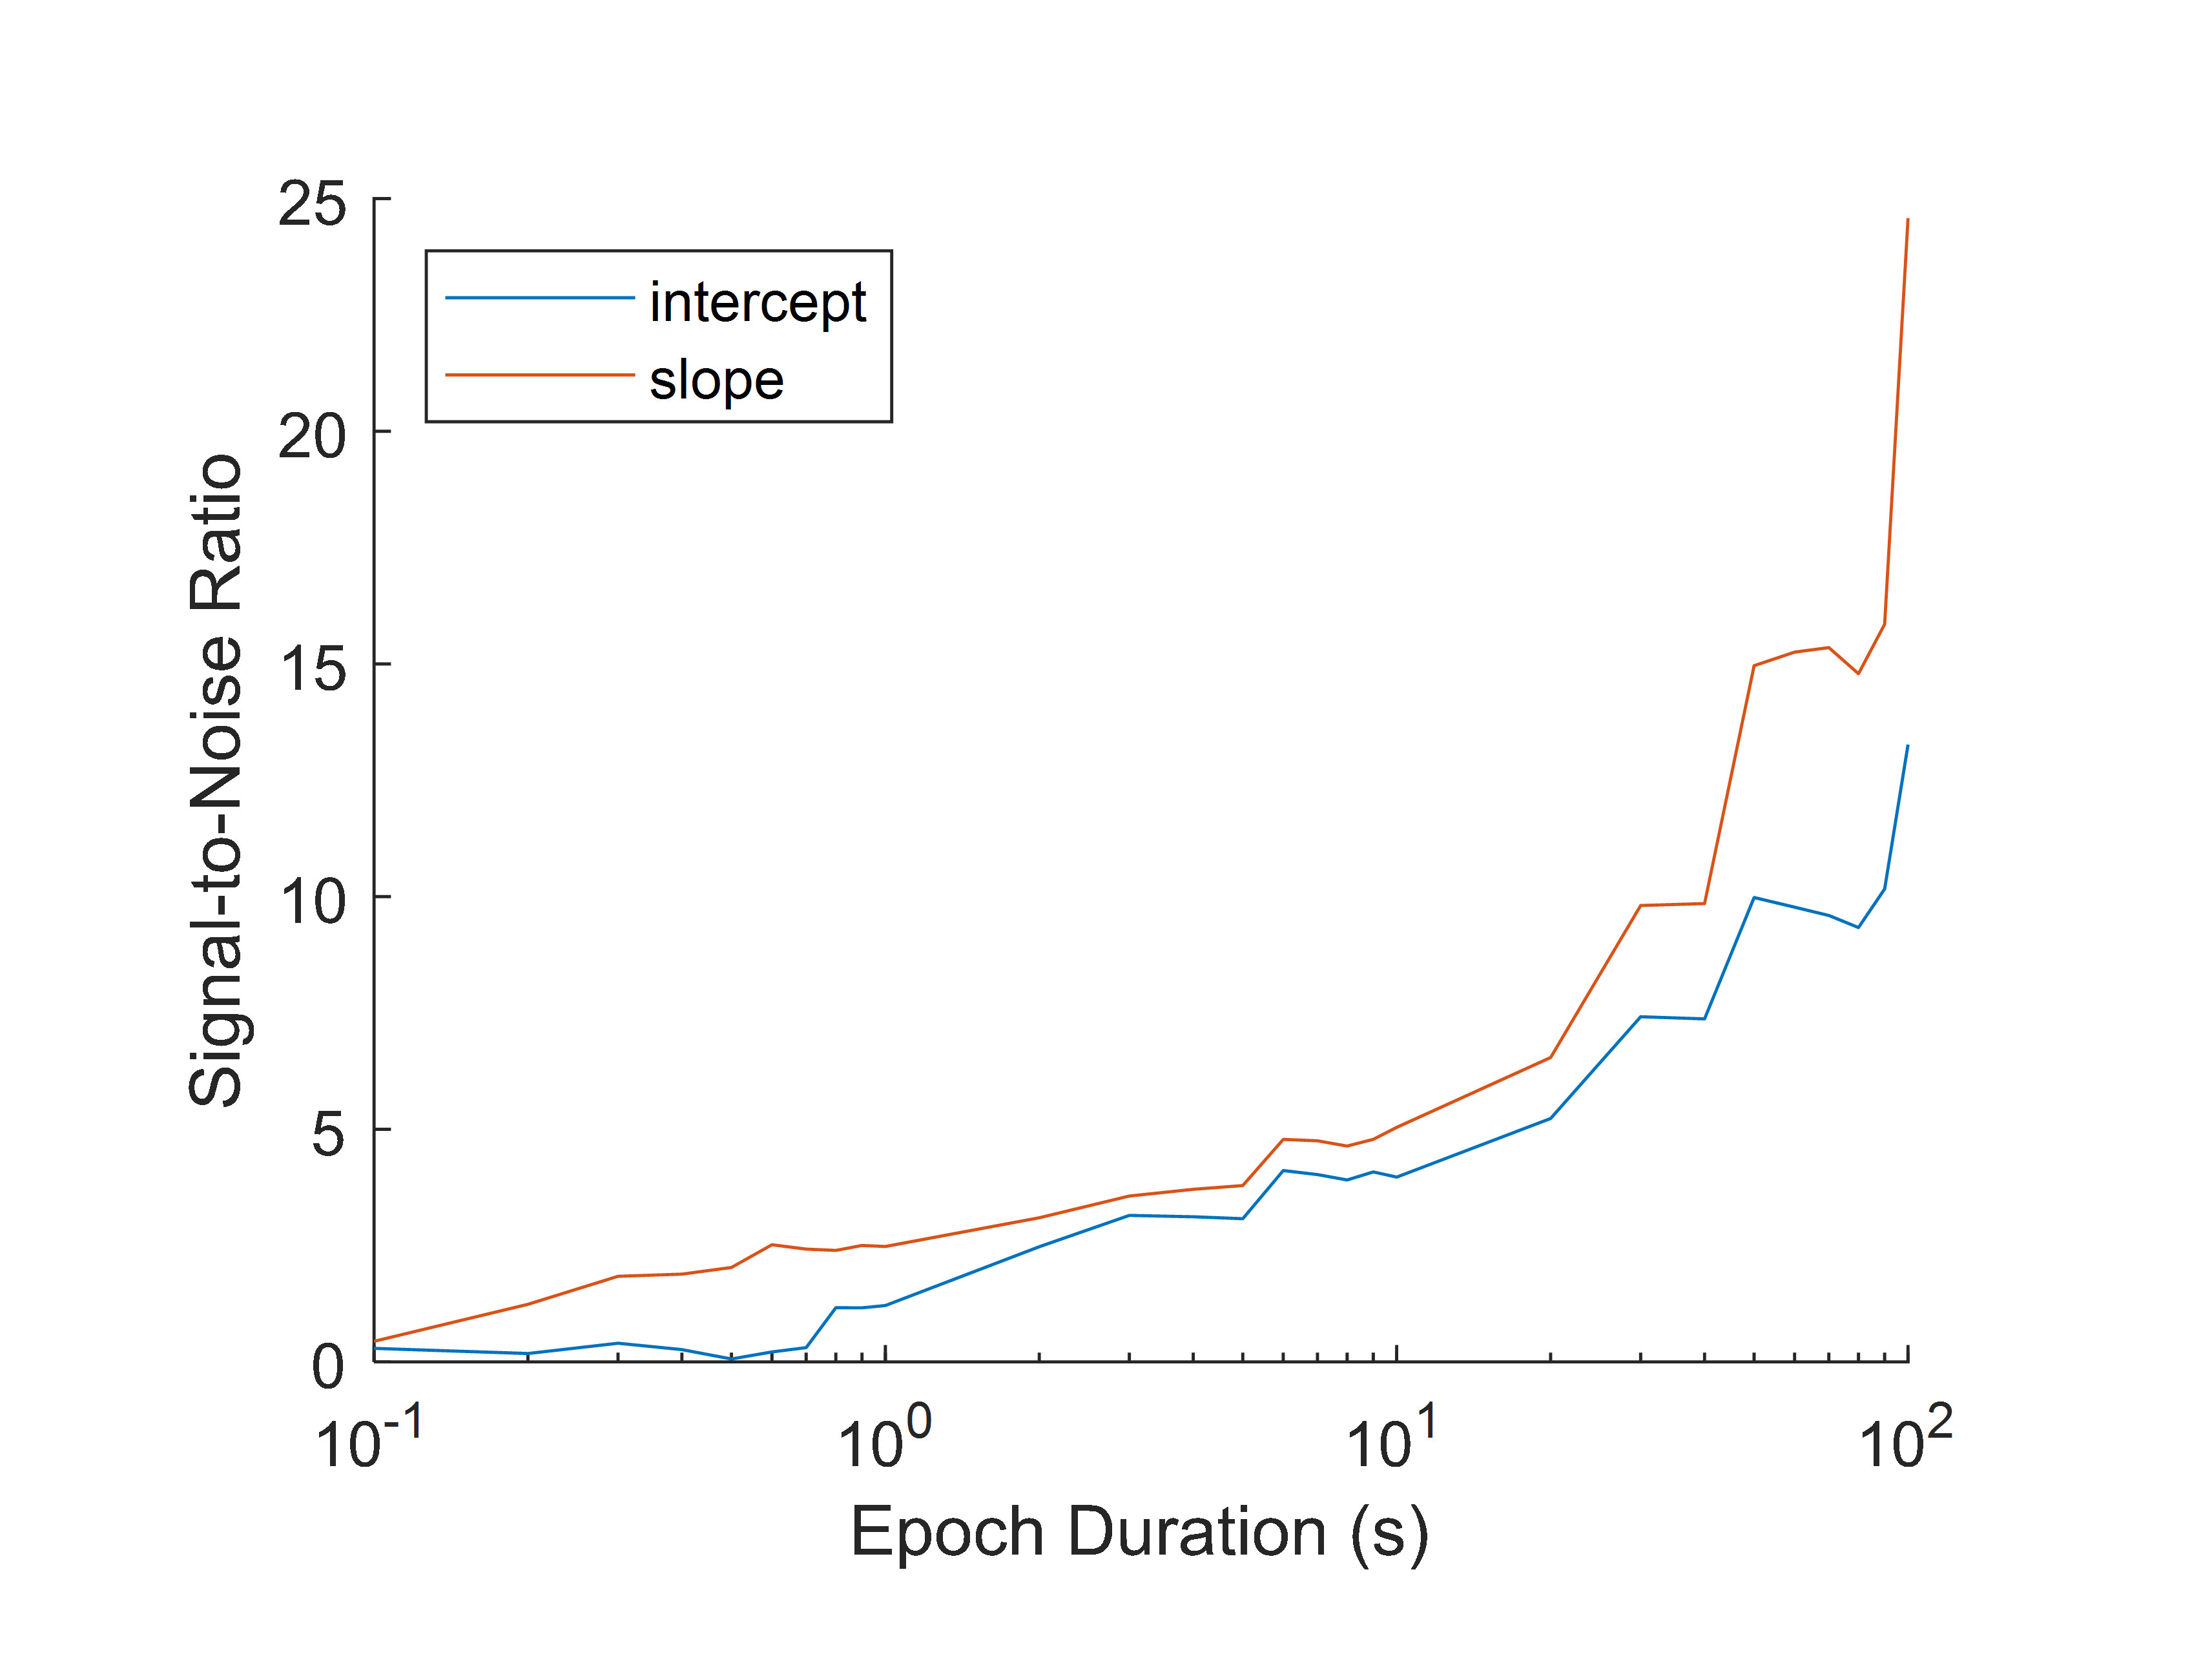

Supplement: supp [file elife-49562-supp-v1.zip › elife_poa_e49562_Figure_4_figure_supplement_5.jpg]
